# Supplementary material for: Microsatellite Mutation Rate during Allohexaploidization of Newly Resynthesized Wheat
Source: Int J Mol Sci. 2012 Oct 1;13(10):12533–43. doi: 10.3390/ijms131012533 (PMC3497285; doi:10.3390/ijms131012533)
Supplement: Supplementary file 1 [file ijms-13-12533-s001.pdf]

# Supplementary Information

Table S1. Markers used in this study.

| Markers scored in SynDH1 and SynDH2 |            |                  | Markers scored in SynDH3 |            |                |
|-------------------------------------|------------|------------------|--------------------------|------------|----------------|
| Marker                              | Chromosome | Repeat Motif     | Marker                   | Chromosome | Repeat Motif   |
| <i>Xwmc312</i>                      | 1A         | (GA)             | <i>Xwmc36</i>            | 1D         | (CA)(GT)       |
| <i>Xbarc17</i>                      | 1A         | (TAA)            | <i>Xgwm642</i>           | 1D         | (GT)           |
| <i>Xbarc148</i>                     | 1A         | (CT)             | <i>Xwmc609</i>           | 1D         | (GA)           |
| <i>Xbarc287</i>                     | 1A         | (TTA)            | <i>Xcfd15</i>            | 1D         | (CT)(TGTA)     |
| <i>Xgwm357</i>                      | 1A         | (GA)             | <i>Xgwm337</i>           | 1D         | (CT)(CACT)(CA) |
| <i>Xwmc83</i>                       | 1A         | (GT)             | <i>Xgpw7109</i>          | 1D         | (GT)           |
| <i>Xbarc187</i>                     | 1B         | (CT)             | <i>Xgpw357</i>           | 1D         | (CA)           |
| <i>Xbarc137</i>                     | 1B         | (CT)             | <i>Xgpw7082</i>          | 1D         | (TGT)          |
| <i>Xbarc81</i>                      | 1B         | (ATG)            | <i>Xgdm126</i>           | 1D         | (CA)           |
| <i>Xwmc406</i>                      | 1B         | (CA)             | <i>Xcfd282</i>           | 1D         | (TG)           |
| <i>Xbarc302</i>                     | 1B         | (ATT)            | <i>Xcfd61</i>            | 1D         | (CACAA)(AC)    |
| <i>Xgwm11</i>                       | 1B         | (TA)CATA(CA)(TA) | <i>Xcfd27</i>            | 1D         | (CA)           |
| <i>Xgwm273</i>                      | 1B         | (GA)             | <i>Xbarc99</i>           | 1D         | (TAG)(TAA)     |
| <i>Xbarc61</i>                      | 1B         | (TAGA)           | <i>Xcfd83</i>            | 1D         | (TG)           |
| <i>Xwmc128</i>                      | 1B         | (GT)             | <i>Xcfd161</i>           | 2D         | (G)(A)         |
| <i>Xgwm153</i>                      | 1B         | (GA)             | <i>Xgwm157</i>           | 2D         | (CT)           |
| <i>Xwmc420</i>                      | 2A         | (GT)             | <i>Xgwm484</i>           | 2D         | (CT)           |
| <i>Xwmc522</i>                      | 2A         | (CT)(TC)         | <i>Xgdm77</i>            | 2D         | (GA)           |
| <i>Xgwm526</i>                      | 2A         | (CT)             | <i>Xgwm320</i>           | 2D         | (GT)(GA)       |
| <i>Xgwm265</i>                      | 2A         | (GT)             | <i>Xgdm93</i>            | 2D         | (GA)           |
| <i>Xwmc658</i>                      | 2A         | (GA)             | <i>Xgwm261</i>           | 2D         | (CT)           |
| <i>Xwmc317</i>                      | 2B         | (GT)             | <i>Xgwm539</i>           | 2D         | (GA)           |
| <i>Xgwm120</i>                      | 2B         | (CT)(CA)         | <i>Xwmc41</i>            | 2D         | (GA) (GCC)     |
| <i>Xwmc592</i>                      | 2B         | (GA)             | <i>Xgwm382</i>           | 2D         | (GA)           |
| <i>Xbarc19</i>                      | 3A         | (TAA)            | <i>Xcfd44</i>            | 2D         | (CT)           |
| <i>Xgwm376</i>                      | 3B         | (CA)(GA)         | <i>Xcfd233</i>           | 2D         | (GA)           |
| <i>Xgwm493</i>                      | 3B         | CA)              | <i>Xcfd53</i>            | 2D         | (CT)(CA)       |
| <i>Xgwm389</i>                      | 3B         | (CT)(GT)         | <i>Xgwm71</i>            | 3D         | (GT)           |
| <i>Xgwm284</i>                      | 3B         | (GA)             | <i>Xcfd9</i>             | 3D         | (TC)           |
| <i>Xgwm181</i>                      | 3B         | (GA)             | <i>Xgwm161</i>           | 3D         | (CT)           |
| <i>Xgwm285</i>                      | 3B         | (GA)             | <i>Xcfd152</i>           | 3D         | (TC)           |
| <i>Xgpw7774</i>                     | 3B         | (AGC)            | <i>Xgwm314</i>           | 3D         | (CT)           |
| <i>Xbarc139</i>                     | 3B         | (CA)             | <i>Xgwm383</i>           | 3D         | (GT)           |
| <i>Xgpw1146</i>                     | 3B         | (CT)             | <i>Xcfd35</i>            | 3D         | (GT)(CT)       |
| <i>Xgpw7148</i>                     | 3B         | (AG)             | <i>Xgwm664</i>           | 3D         | (GA)           |
| <i>Xgwm299</i>                      | 3B         | (GA)(TAG)        | <i>Xgdm72</i>            | 3D         | (CT)           |
| <i>Xgwm247</i>                      | 3B         | (GA)             | <i>Xbarc323</i>          | 3D         | (CT)           |
| <i>Xgpw3134</i>                     | 3B         | (GA)             | <i>Xwmc457</i>           | 4D         | (CA)           |
| <i>Xgpw3248</i>                     | 3B         | (AG)             | <i>Xwmc331</i>           | 4D         | (CA) (CT)      |
| <i>Xwmc675</i>                      | 3B         | (GA)             | <i>Xwmc720</i>           | 4D         | (GA)           |
| <i>Xgwm340</i>                      | 3B         | (GA)             | <i>Xwmc473</i>           | 4D         | (CA)           |
| <i>Xwmc313</i>                      | 4A         | (CA)             | <i>Xgdm61</i>            | 4D         | (GT)           |

Table S1. Cont.

| Markers scored in SynDH1 and SynDH2 |       |                | Markers scored in SynDH3 |    |                 |
|-------------------------------------|-------|----------------|--------------------------|----|-----------------|
| <i>Xwmc468</i>                      | 4A    | (CT)           | <i>Xwmc285</i>           | 4D | (CA) (CA)       |
| <i>Xgwm610</i>                      | 4A    | (GA)           | <i>Xgdm34</i>            | 4D | (GA)            |
| <i>Xgwm251</i>                      | 4B    | (CA)           | <i>Xgwm192</i>           | 4D | (CT)            |
| <i>Xgwm595</i>                      | 5A    | (GA)           | <i>Xwmc443</i>           | 5D | (CT)            |
| <i>Xbarc151</i>                     | 5A/7A | (CT)           | <i>Xgwm212</i>           | 5D | (CT)            |
| <i>Xbarc142</i>                     | 5B    | (CT)           | <i>Xgdm63</i>            | 5D | (CT)            |
| <i>Xgwm499</i>                      | 5B    | (GA)           | <i>Xgwm190</i>           | 5D | (CT)            |
| <i>Xgwm544</i>                      | 5B    | (CT)(ATCT)(CT) | <i>Xcfd12</i>            | 5D | (CTT)           |
| <i>Xwmc28</i>                       | 5B    | GT)            | <i>Xcfd3</i>             | 5D | (CA)            |
| <i>Xgwm67</i>                       | 5B    | (CA)           | <i>Xwmc318</i>           | 5D | (GT)            |
| <i>Xgwm604</i>                      | 5B    | (GA)           | <i>Xgwm639</i>           | 5D | (GA)            |
| <i>Xbarc232</i>                     | 5B    | (CT)           | <i>Xbarc347</i>          | 5D | (CT)            |
| <i>Xgwm234</i>                      | 5B    | (CT)(CA)       | <i>Xcfd57</i>            | 5D | (GA)            |
| <i>Xbarc59</i>                      | 5B    | (TAGA)         | <i>Xwmc233</i>           | 5D | (CA)            |
| <i>Xbarc4</i>                       | 5B    | (TTA)          | <i>Xwmc357</i>           | 5D | (GA) (GT)       |
| <i>Xgwm356</i>                      | 6A    | (GA)           | <i>Xgwm325</i>           | 6D | (CT)            |
| <i>Xbarc3</i>                       | 6A    | (CCT)          | <i>Xgwm469</i>           | 6D | (CT)(CA)        |
| <i>Xgwm570</i>                      | 6A    | (CT)(GT)       | <i>Xwmc416</i>           | 6D | (CA)(CA)(CA)    |
| <i>Xgwm550</i>                      | 6A    | (CT)(GT)       | <i>Xgdm36</i>            | 6D | (GT)            |
| <i>Xwmc553</i>                      | 6A    | (CA)           | <i>Xcfd42</i>            | 6D | (GA)            |
| <i>Xgwm133</i>                      | 6B    | (CT)           | <i>Xcfd49</i>            | 6D | (GA)            |
| <i>Xwmc398</i>                      | 6B    | (GT)           | <i>Xbarc173</i>          | 6D | (ATT)(TAG)(CAA) |
| <i>Xbarc178</i>                     | 6B    | (ATT)          | <i>Xbarc96</i>           | 6D | (TAA)           |
| <i>Xwmc494</i>                      | 6B    | (GT)           | <i>Xcfd33</i>            | 6D | (CA)            |
| <i>Xwmc537</i>                      | 6B    | (CA) (CT)      | <i>Xgdm99</i>            | 7D | (GA)            |
| <i>Xbarc79</i>                      | 6B    | (TAGA)(TC)     | <i>Xgwm111</i>           | 7D | (CT)(GT)        |
| <i>Xwmc487</i>                      | 6B    | (CA)           | <i>Xgwm428</i>           | 7D | (GA)            |
| <i>Xgwm626</i>                      | 6B    | (CT)(GT)       | <i>Xwmc94</i>            | 7D | (GT)            |
| <i>Xgpm1079</i>                     | 6B    | (GT)           | <i>Xwmc438</i>           | 7D | (CA)(CA)        |
| <i>Xgpm3153</i>                     | 6B    | (AC)           | <i>Xgdm86</i>            | 7D | (CT)            |
| <i>Xbarc127</i>                     | 7A    | (CT)           | <i>Xwmc824</i>           | 7D | (GA)            |
| <i>Xgwm130</i>                      | 7A    | (GT)           | <i>Xcfd14</i>            | 7D | (TC)            |
| <i>Xgwm276</i>                      | 7A    | (CT)           | <i>Xwmc506</i>           | 7D | (GA) (GA)       |
| <i>Xwmc346</i>                      | 7A    | (GA) (GT)      | <i>Xcfd31</i>            | 7D | (GA)            |
| <i>Xcfa2257</i>                     | 7A    | (TG)           | <i>Xpsp3123</i>          | 7D | (TC)            |
| <i>Xbarc72</i>                      | 7B    | (CT)(TCTA)(TC) | <i>Xbarc172</i>          | 7D | (ATT)           |
| <i>Xwmc76</i>                       | 7B    | (GT)           | <i>Xcfd68</i>            | 7D | (GT)            |
| <i>Xwmc364</i>                      | 7B    | (CA)           | -                        | -  | -               |
| <i>Xgwm333</i>                      | 7B    | (GA)           | -                        | -  | -               |

Of the 160 markers, 148 were mapped using the SynDH populations used in this study. The mapped locations of the remaining 12 markers (highlighted as red) were determined on the basis of information from GrainGenes (<http://wheat.pw.usda.gov/cgi-bin/graingenes/browse.cgi?class=marker>). The 12 markers highlighted as yellow were used in both SynDH1 and SynDH2 populations. The repeat motifs highlighted as blue were obtained in this study by SSR sequencing.

**Figure S1.** SSR amplification patterns of marker *Xbarc137* in some SynDH1 lines.

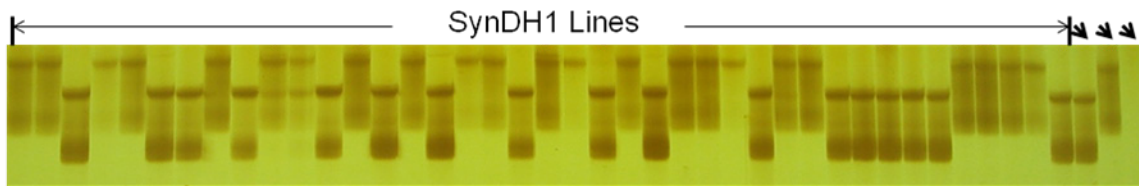

SSR amplification patterns of marker *Xbarc137* in some SynDH1 lines. The arrows show the three parents AS313, Langdon and AS60 from left to right, respectively.

© 2012 by the authors; licensee MDPI, Basel, Switzerland. This article is an open access article distributed under the terms and conditions of the Creative Commons Attribution license (<http://creativecommons.org/licenses/by/3.0/>).
